# Supplementary material
Source: MDPI journal article supplement (https://www.mdpi.com/1424-2818/12/10/397)
Supplement: s1 [file s1]

**TABLE S1.** List of functional traits measured in the 36 studies comparing co-occurring trees and lianas. The functional traits are organized by plant economics spectrum. Only traits measured at the individual level are considered.

| Plant economics spectrum | Functional traits                                                                                                                                                                                                                                                                                                                                                                                                                                                                                                                                                                                                                                                                                                                                                                                                                                                                                                                                                                                                                                                                                                                                                                                                                                                                                                                                                                                                                                                                                                                                                                                                                                                                                                                                                                                                                                                                                                                                                                                                                                                                                                                                                                                                                                                                                                                                                                                                                                                                                                                                                                                                                                                                                                                                                                                                                                                                                                                                                                                                                                                                                                                                                                                                                                                                                                                                                                                                                                                                                                                                                                                                                                           |
|--------------------------|-------------------------------------------------------------------------------------------------------------------------------------------------------------------------------------------------------------------------------------------------------------------------------------------------------------------------------------------------------------------------------------------------------------------------------------------------------------------------------------------------------------------------------------------------------------------------------------------------------------------------------------------------------------------------------------------------------------------------------------------------------------------------------------------------------------------------------------------------------------------------------------------------------------------------------------------------------------------------------------------------------------------------------------------------------------------------------------------------------------------------------------------------------------------------------------------------------------------------------------------------------------------------------------------------------------------------------------------------------------------------------------------------------------------------------------------------------------------------------------------------------------------------------------------------------------------------------------------------------------------------------------------------------------------------------------------------------------------------------------------------------------------------------------------------------------------------------------------------------------------------------------------------------------------------------------------------------------------------------------------------------------------------------------------------------------------------------------------------------------------------------------------------------------------------------------------------------------------------------------------------------------------------------------------------------------------------------------------------------------------------------------------------------------------------------------------------------------------------------------------------------------------------------------------------------------------------------------------------------------------------------------------------------------------------------------------------------------------------------------------------------------------------------------------------------------------------------------------------------------------------------------------------------------------------------------------------------------------------------------------------------------------------------------------------------------------------------------------------------------------------------------------------------------------------------------------------------------------------------------------------------------------------------------------------------------------------------------------------------------------------------------------------------------------------------------------------------------------------------------------------------------------------------------------------------------------------------------------------------------------------------------------------------------|
| LEAF TRAITS              | <p>(SLA) Specific Leaf Area; (LMA) Leaf Mass per Area; (LA) Leaf Area; (LS) Leaf Size; (LW) Leaf weight; (Lth) Leaf Thickness; (LL) Leaf Life Span; (LTD) Leaf Tissue Density; (LWC) LEAF Water content; (LDMC) Leaf dry matter content; (CC<sub>mass</sub>) Leaf construction cost per unit dry mass; (CC<sub>area</sub>) Leaf construction cost per unit leaf area; (MC<sub>mass</sub>) Leaf Maintenance cost per unit dry mass; (MC<sub>area</sub>) Leaf Maintenance cost per unit Leaf area; (PI) Petiole length; (A<sub>1</sub>:A<sub>s</sub>) Leaf/sapwood area ratio; (DW/SW) Leaf dry weight to saturated fresh weight; (C<sub>leaf</sub>) Pre turgor loss leaf hydraulic capacitance; (Fps) specific force to punch; (A<sub>max</sub>) Maximum net leaf CO<sub>2</sub> assimilation rate; (A<sub>area</sub>) maximum leaf CO<sub>2</sub> assimilation capacity per unit leaf area; (A<sub>mass</sub>) maximum leaf CO<sub>2</sub> assimilation capacity per unit leaf mass; (A<sub>sat</sub>) Light saturated leaf CO<sub>2</sub> assimilation capacity; (An) Photosynthetic nitrogen use efficiency; (gs) Stomatal conductance; (gw) Time integrated stomatal conductance to water vapour; (GC<sub>L</sub>) Guard cell length; (Sd) Stomatal density; (c<sub>v</sub>/c<sub>a</sub>) intercellular to atmospheric carbon dioxide ratio; (K<sub>i</sub>) Leaf specific hydraulic conductivity; (WUE) Water use efficiency; (PNUE) Photosynthetic Nitrogen-use efficiency; (PPUE) Photosynthetic Phosphorus-use efficiency; (N<sub>mass</sub>) Mass based nitrogen content; (N<sub>area</sub>) Area based nitrogen content; (K<sub>mass</sub>) Mass based potassium content; (K<sub>area</sub>) Area based potassium content; (Mg<sub>mass</sub>) Mass based magnesium content; (Mg<sub>area</sub>) Area based magnesium content; (Ca<sub>area</sub>) Area based calcium content; (Ca<sub>mass</sub>) Mass based calcium content; (N<sub>leaf</sub>) total nitrogen content; (C<sub>leaf</sub>) total carbon content; (P<sub>leaf</sub>) total phosphorus content; (C/N) Carbon to Nitrogen Ratio; (C/P) Carbon to phosphorus ratio; (N/P) Nitrogen to phosphorus ratio; (V<sub>max</sub>) Maximum carboxylation capacity; (J<sub>max</sub>) Maximum rate of electron transport; (PPFD) Photosynthetically active photon flux density; (Rd<sub>area</sub>) Area-based dark respiration; (Rd<sub>mass</sub>) Mass-based dark respiration; (δ<sup>13</sup>C) Leaf Carbon 13 isotope; (δ<sup>15</sup>N) Leaf Nitrogen 15 isotope; (δ<sup>18</sup>O) Leaf Oxygen 18 isotope; (Chl) Chlorophyll content; (Car) Carotenoid content; (Ψ<sub>leaf pd</sub>) Pre-down leaf water potential; (Ψ<sub>leaf md</sub>) Mid-day leaf water potential; (LAR) Leaf area ratio; (LMF) Leaf mass fraction; (LAD) Leaf area density; (π<sub>tlp</sub>) Leaf turgor loss point; (π<sub>tlp100</sub>) Osmotic potential at full turgor; (R<sub>550nm</sub>) Reflectance at 550nm; (R<sub>800nm</sub>) Reflectance at 800nm; (mSR<sub>705</sub>) Modified simple ratio at 705nm; (mND<sub>705</sub>) Modified Normal Difference at 705nm; (WBI<sub>970</sub>) Water Band Index; (R<sub>m</sub>) Respiration at 25C per unit mass; (TNC) Non-structural carbohydrates; (Q<sub>10</sub>) Proportional increase in respiration with 10C warming; (e<sub>i</sub>) Vapor pressure in leaf intercellular air spaces; (ASM) Air space mesophyll; (E) Transpiration rate; (NAR) Net assimilation rate; (pex) Proportion of O atoms exchanging with medium water during cellulose synthesis; (px) Proportion of water in developing cells not subject to evaporative 18O enrich;</p> |
| STEM TRAITS              | <p>(K<sub>s</sub>) Theoretical specific xylem hydraulic conductivity; (K<sub>p</sub>) Potential hydraulic conductivity; (ρ<sub>wood</sub>) wood specific gravity*; (P50) Water potential at 50 percent loss of conductivity; (BT) Bark thickness; (SW) Stem weight; (IL) Internode length; (TwB) Twig biomass; (N<sub>stem</sub>) Stem nitrogen content; (Hv) Huber Value; (V<sub>n</sub>) Number of vessels per area; (VA) Vessel lumen area; (MVL) Maximum vessel length; (MLV) Mean longest vessel; (D<sub>v</sub>) Vessel diameter; (MVD) Mean vessel lumen diameter; (BVD) Biggest vessel lumen diameter; (WLR) Wall-lumen ratio; (D<sub>H</sub>) Hydraulically weighted vessel diameter; (Parenchyma) Parenchyma cross sectional area; (Pp) Percentage of xylem</p>                                                                                                                                                                                                                                                                                                                                                                                                                                                                                                                                                                                                                                                                                                                                                                                                                                                                                                                                                                                                                                                                                                                                                                                                                                                                                                                                                                                                                                                                                                                                                                                                                                                                                                                                                                                                                                                                                                                                                                                                                                                                                                                                                                                                                                                                                                                                                                                                                                                                                                                                                                                                                                                                                                                                                                                                                                                                                   |

|                    |                                                                                                                                                                                                                                                                                                                                                                                                                                                                                                                                                                                                                                                                                                                                                                                                                                                                                                  |
|--------------------|--------------------------------------------------------------------------------------------------------------------------------------------------------------------------------------------------------------------------------------------------------------------------------------------------------------------------------------------------------------------------------------------------------------------------------------------------------------------------------------------------------------------------------------------------------------------------------------------------------------------------------------------------------------------------------------------------------------------------------------------------------------------------------------------------------------------------------------------------------------------------------------------------|
|                    | represented by parenchyma; (Pf) Percentage of xylem represented by fibers; (D <sub>F</sub> ) Fiber diameter; (Pv) Percentage of xylem represented by vessels; (A <sub>s</sub> ) Sapwood cross-sectional area; (XA) Xylem cross sectional area; (Ψ <sub>s</sub> ) xylem water potential; (θ <sub>s,x</sub> ) sapwood saturated water content; (Aph) Phloem area; (Api) Pith area; (MOR) Modulus of Rupture; (E <sub>x</sub> ) sapwood bulk elastic modulus; (Pe) Air entry threshold; (SD) stem density; (SMF) Stem mass fraction; (π <sub>o,x</sub> ) sapwood osmotic potential at full turgor; (Ψ <sub>tlp,x</sub> ) sapwood water potential at turgor loss point; (RWC <sub>tlp,x</sub> ) relative water content at turgor loss point; (Cx) sapwood capacitance; (δ13C) Stem Carbon 13 isotope; (δ15N) Stem Nitrogen 15 isotope; (DMD) Dry mass density; (Gas content) Gas volumetric content; |
| ROOT TRAITS        | (SRL) Specific Root Length; (RMF) Root mass fraction; (RMD) Root Mass Density; (RD) Root diameter; (RTD) Root tissue density; (RBI) Root branching intensity; (C <sub>root</sub> ) total root carbon; (N <sub>root</sub> ) total root nitrogen; (P <sub>root</sub> ) total root phosphorus; (C:N <sub>root</sub> ) root carbon to nitrogen ratio; (C:P <sub>root</sub> ) Root carbon to phosphorus ratio; (N:P <sub>root</sub> ) root nitrogen to phosphorus ratio; Mycorrhizal colonization; nodule biomass;                                                                                                                                                                                                                                                                                                                                                                                    |
| WHOLE PLANT TRAITS | (NUE) Whole-plant N use efficiency; (Rp) The 13C/12C ratio of plant C; (TEc) Whole-plant transpiration efficiency of C gain; (v) Whole-plant transpiration efficiency of C gain;                                                                                                                                                                                                                                                                                                                                                                                                                                                                                                                                                                                                                                                                                                                 |

\* Most accepted name for the functional trait referred as “wood density” (WD) in the studies selected for review.
